# Supplementary material for: Dynamics of the Gut Microbiota and Faecal and Serum Metabolomes during Pregnancy—A Longitudinal Study
Source: MDPI journal article supplement (doi:10.3390/nu16040483), 2024-02-07
Supplement: s1 [file s1]

## Supplementary Material

Table S1 Characteristics of participants

| Parameter             | Mean  | SEM    |
|-----------------------|-------|--------|
| Age                   | 27.9  | 0.7084 |
| BMI                   | 21.71 | 0.5628 |
| Parity                | 0.513 | 0.100  |
| Spontaneous labor (n) | 23    |        |
| Caesarean section (n) | 8     |        |

BMI: body mass index.

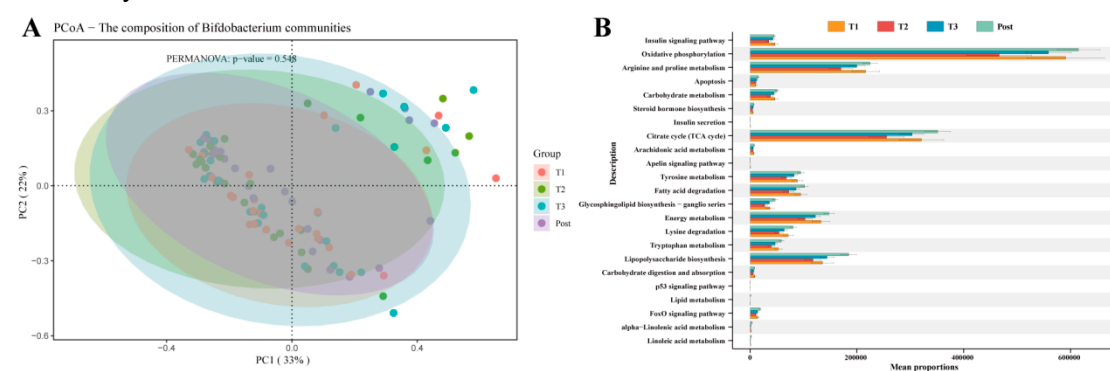

**Figure S1** The composition of *Bifidobacterium* communities (A) and microbial functions altered during pregnancy (B). T1: first trimester; T2: second trimester; T3: third trimester; Post: postpartum.

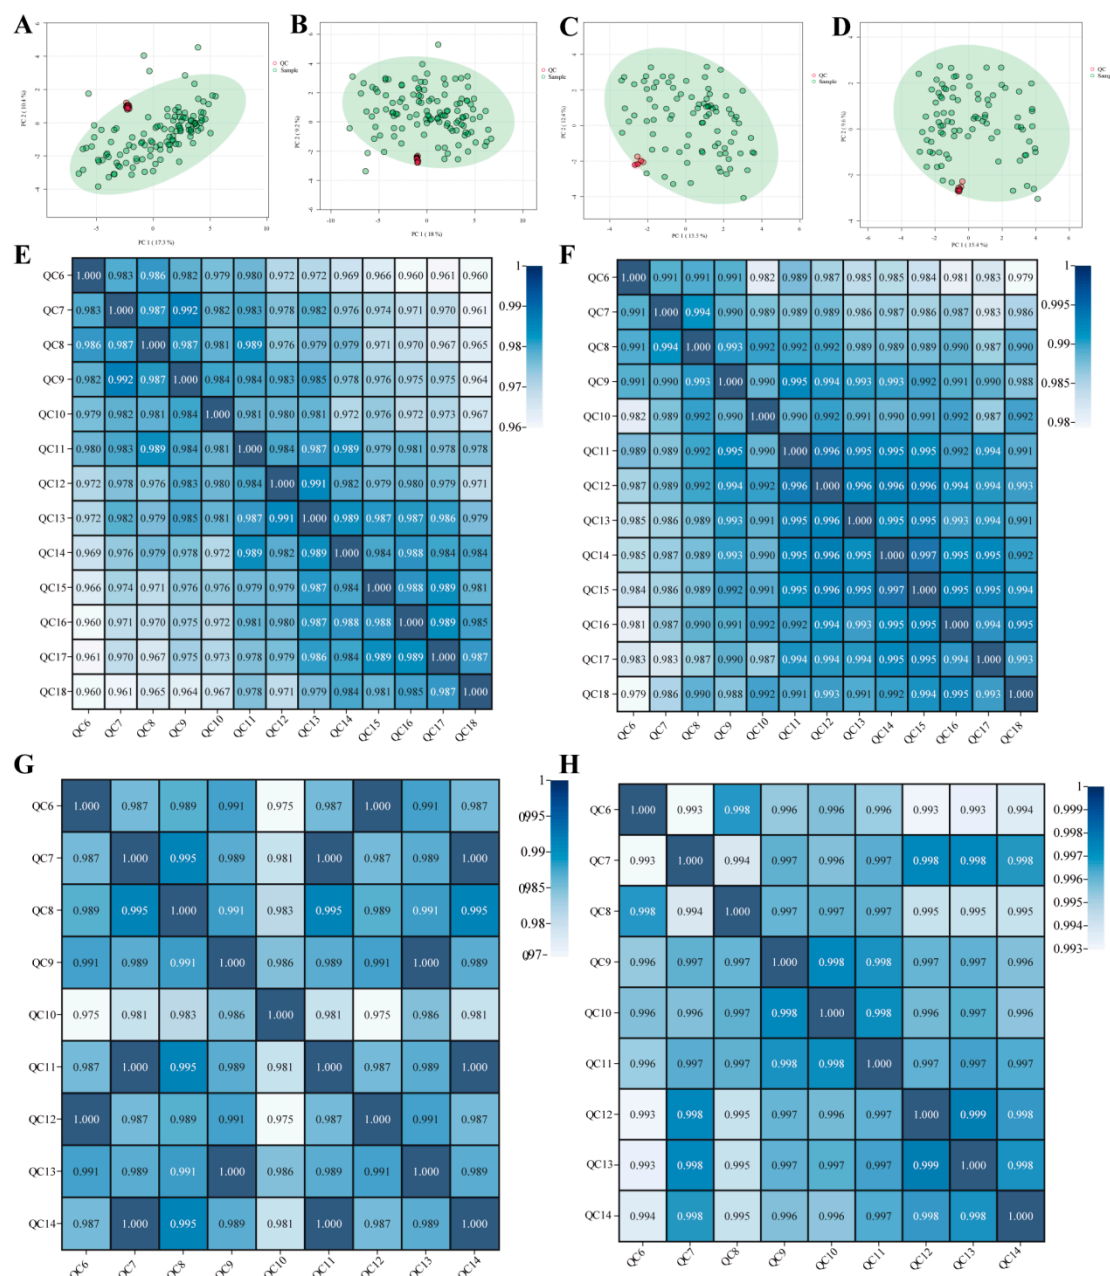

**Figure S2** Quality control (QC) assessment for non-targeted metabolomics in faecal and serum samples. PCA score plots for all stool samples and QC samples in ESI<sup>+</sup> (A) and ESI<sup>-</sup> mode (B). PCA score plots for all serum samples and QC samples in ESI<sup>+</sup> (C) and ESI<sup>-</sup> mode (D). Spearman's correlation analysis for faecal samples in ESI<sup>+</sup> (E) and ESI<sup>-</sup> (F) mode. Spearman's correlation analysis for faecal samples in ESI<sup>+</sup> (G) and ESI<sup>-</sup> (H) mode.

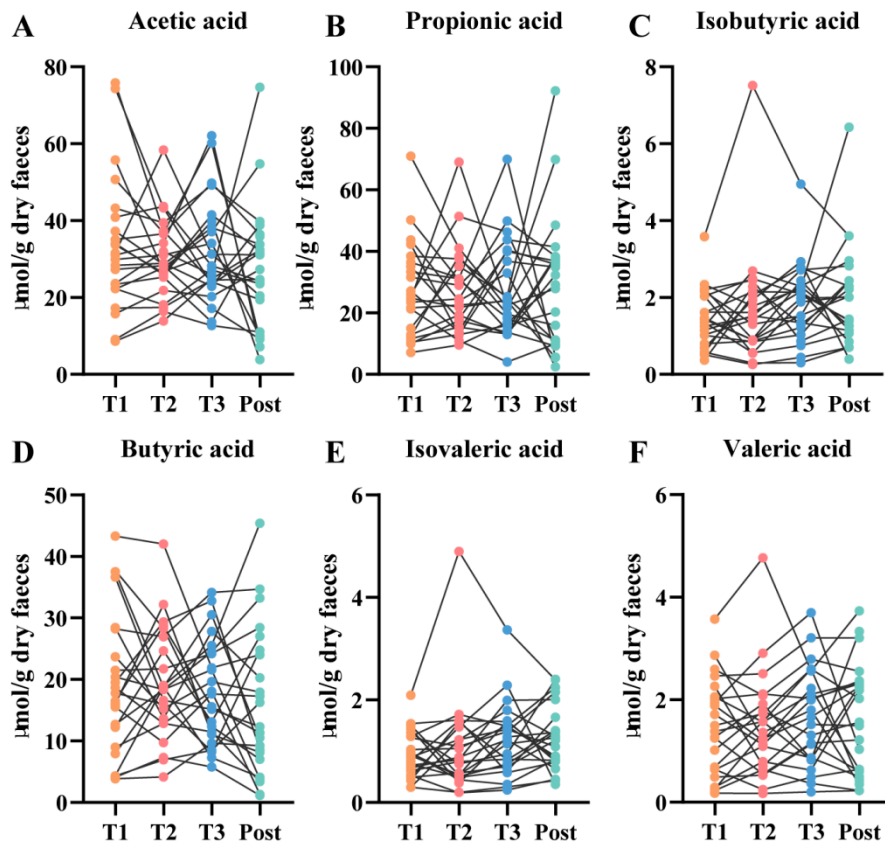

**Figure S3** Temporal changes of short-chain fatty acids levels during pregnancy. (A) Acetic acid. (B) Propionic acid. (C) Isobutyric acid. (D) Butyric acid. (E) Isovaleric acid. (F) Valeric acid.
